# Supplementary material
Source: PubMed Central journal article supplement (PMC8284448)
Supplement: aac00356-21_supp_s1_seq1.pdf [file aac00356-21_supp_s1_seq1.pdf]

**Table S1.** Bacteriostatic concentrations of  $\beta$ -lactam antibiotics ( $\mu\text{g/mL}$ ) for test strains

| CB   | NAF | LOX | MEM  | CRO | CEC | FOX |
|------|-----|-----|------|-----|-----|-----|
| 1483 | 128 | 16  | 7    | 512 | 128 | 64  |
| 1485 | 32  | 0.5 | 1.1  | 512 | 128 | 128 |
| 5079 | 16  | 16  | 7.5  | 4   | 128 | 64  |
| 5080 | 8   | 2   | 2.5  | 16  | 64  | 48  |
| 5083 | 64  | 1   | 12   | 128 | 64  | 32  |
| 5082 | 64  | 1   | 24   | 16  | 64  | 128 |
| 5088 | 8   | 6   | 3.75 | 128 | 64  | 48  |
| 5089 | 8   | 4   | 2.5  | 16  | 32  | 32  |
| 1631 | 12  | 2   | 0.6  | 128 | 64  | 64  |
| 1634 | 4   | 0.4 | 0.15 | 8   | 128 | 32  |
| 1663 | 8   | 4   | 15   | 128 | 64  | 64  |
| 1664 | 4   | 0.5 | 2.5  | 32  | 32  | 64  |
| 5057 | 16  | 2.5 | 2.5  | 32  | 32  | 72  |
| 5059 | 64  | 10  | 10   | 32  | 64  | 128 |
| 5062 | 256 | 512 | 64   | 512 | 128 | 64  |
| 5063 | 256 | 512 | 64   | 512 | 128 | 128 |
| 5015 | 128 | 8   | 18   | 32  | 16  | 64  |
| 5016 | 256 | 1   | 40   | 256 | 128 | 128 |

**A**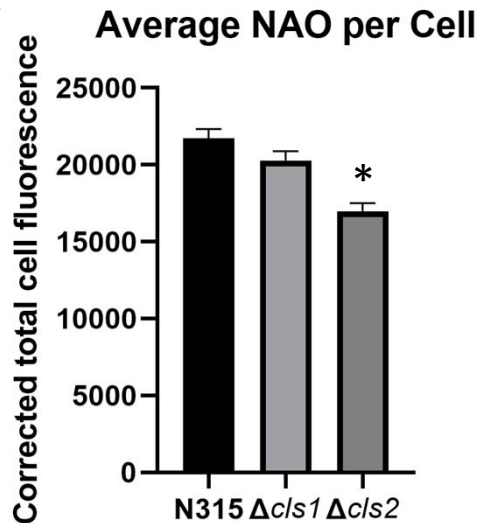**B**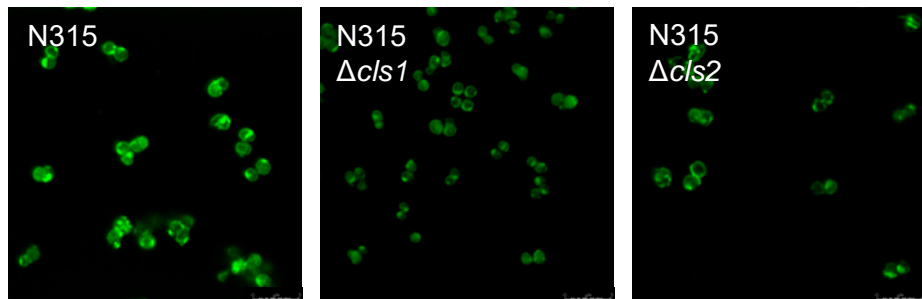

**Figure S1.** Quantification of NAO fluorescence in cardiolipin synthase knockout mutants (**A**) with representative images (**B**).
